# Supplementary material for: Recombinant Mycobacterium smegmatis delivering a fusion protein of human macrophage migration inhibitory factor (MIF) and IL-7 exerts an anticancer effect by inducing an immune response against MIF in a tumor-bearing mouse model
Source: HighWire-hosted journal article supplement (doi:10.1136/jitc-2021-003180), 2021-08-01

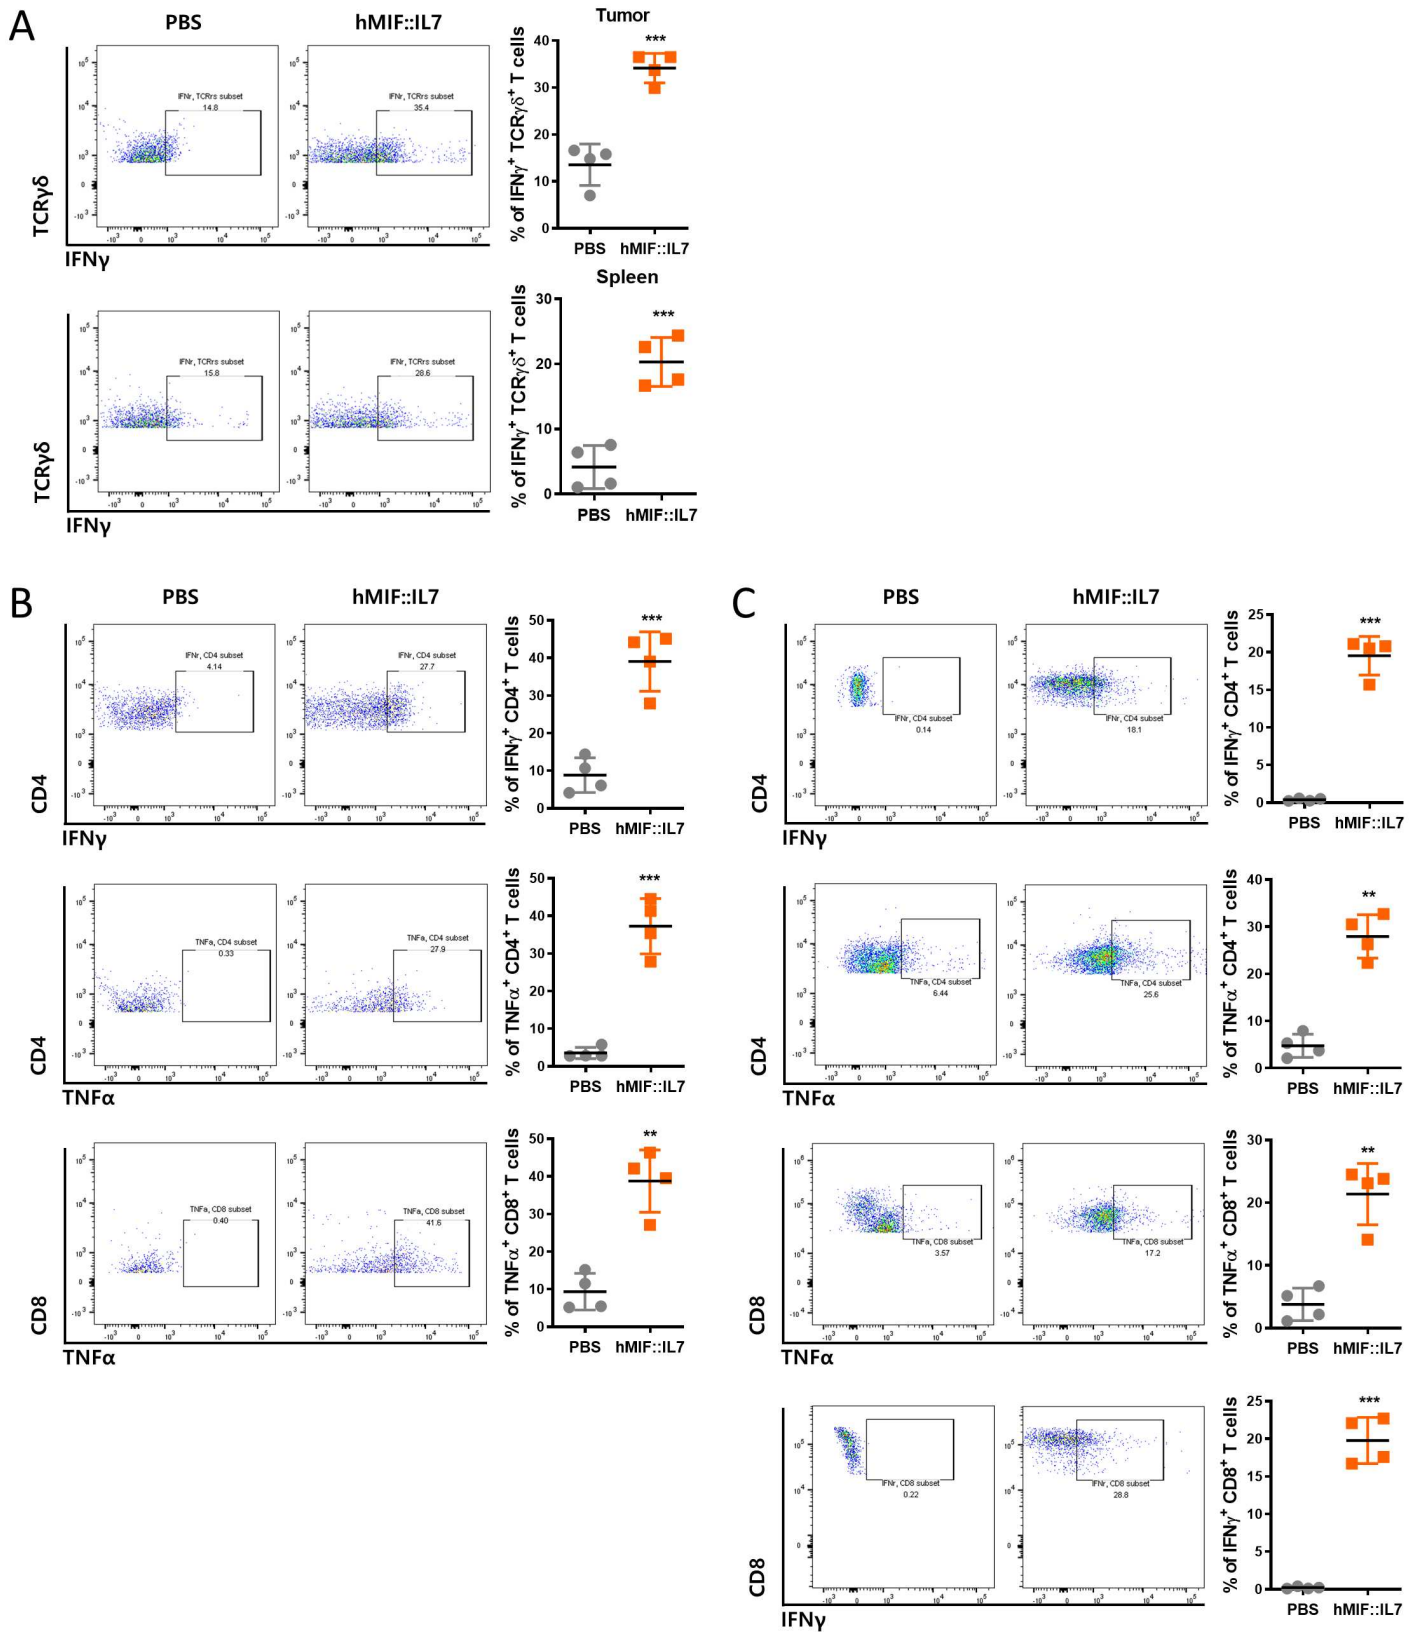

Supplement: jitc-2021-003180supp004_data_supplement.pdf [file jitc-2021-003180supp004_data_supplement.pdf]
